# Supplementary material
Source: PubMed Central journal article supplement (PMC4210089)
Supplement: embr0015-0576-sd2.pdf [file embr0015-0576-sd2.pdf]

Figure S2

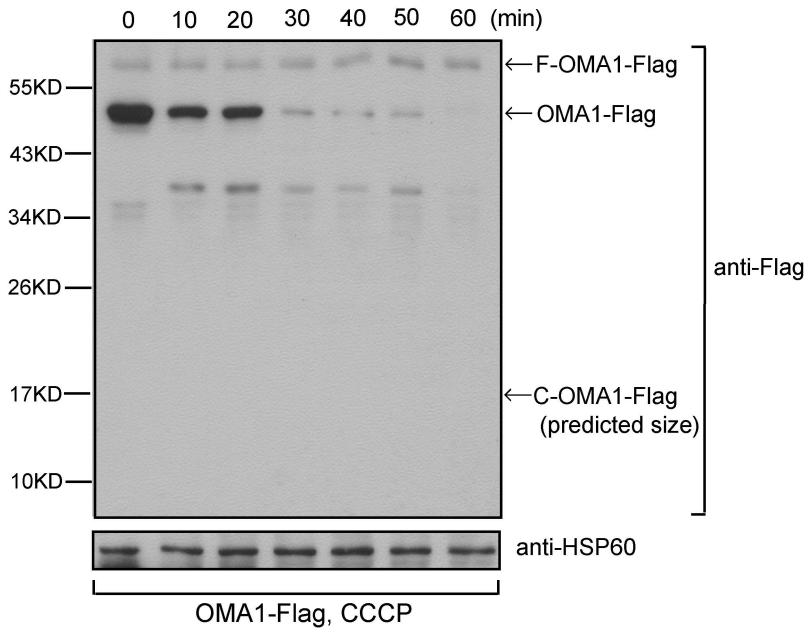

**Figure S2. The C-terminal short form of OMA1 is degraded quickly.**

Mouse OMA1-Flag expressed OMA1<sup>-/-</sup> MEFs were treated with CCCP (20 $\mu$ M) for 10, 20, 30, 40, 50 or 60 minutes respectively, cells lysates were analyzed by Western blot with anti-Flag and anti-HSP60 antibodies.
