# Supplementary material
Source: PubMed Central journal article supplement (PMC4210089)
Supplement: embr0015-0576-sd5.pdf [file embr0015-0576-sd5.pdf]

Figure S5

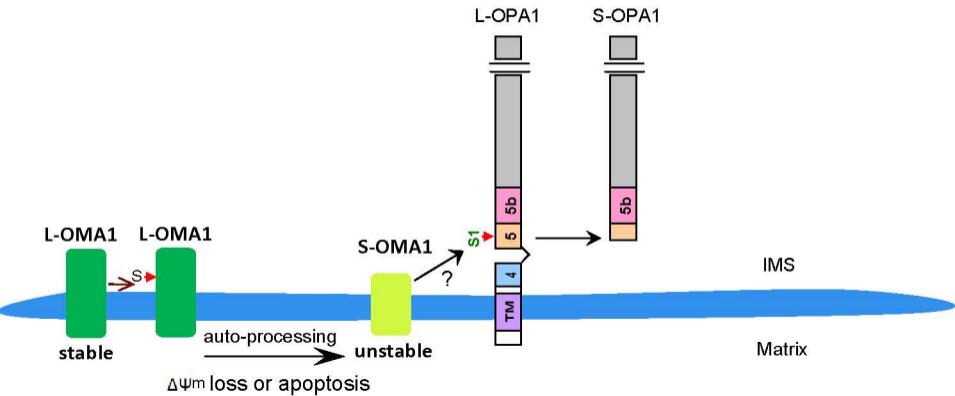

**Figure S5. The model of OMA1 processing in mitochondria.**

OMA1 is mitochondrial inner membrane protein. Under normal state, uncleaved OMA1 (L-OMA1) is stable; L-OMA1 is auto-cleaved to produce an unstable short form (S-OMA1) upon mitochondrial membrane potential ( $\Delta\psi_m$ ) loss or apoptosis; S-OMA1 may be functional to process OPA1 at S1 site. “?” indicates unconfirmed.
