# Supplementary material
Source: PubMed Central journal article supplement (PMC4210089)
Supplement: embr0015-0576-sd6.pdf [file embr0015-0576-sd6.pdf]

## SUPPLEMENTARY INFORMATION

### METHODS

#### *Plasmids and shRNAi constructions*

Mouse OMA1 cDNA and its mutants were subcloned into pMSCV-puro vector with a C-terminal 3xFlag tag; in Retro-X Tet-On Advanced Inducible Expression System (Clontech), mouse OMA1 cDNA is subcloned into pRetroX-Tight-Pur vector with a C-terminal Flag tag; shRNAi against human OMA1, mouse Prohibitin 1 and 2 were performed, the oligonucleotides

5'-

GATCCCCGAAGTGCTTTGTCATCTAATTCAAGAGATTAGATGACAAAGCACTTCTTTTT  
GGAAA-3' and

5'-

AGCTTTTCCAAAAAGAAGTGCTTTGTCATCTAATCTCTTGAATTA GATGACAAAGCAC  
TTCGGG-3' for human OMA1;

5'-

GATCCCCGCGGCAACATTTGGGCTTATTCAAGAGATAAGCCCAAATGTTGCCGCTTTTT  
GGAAA-3' and

5'-

AGCTTTTCCAAAAAGCGGCAACATTTGGGCTTATCTCTTGAATAAGCCCAAATGTTGC  
CGCGGG-3'for mouse Prohibitin 1;

5'-

GATCCCCGACCTGCAGATGGTGAACATTCAAGAGATGTTACCATCTGCAGGTCTTTT  
TGGAAA-3'and5'-

AGCTTTTCCAAAAAGACCTGCAGATGGTGAACATCTCTTGAATGTTACCATCTGCAG  
GTCGGG-3' for mouse Prohibitin 2.

#### *Western Blot Analysis*

Cell lysates were loaded onto the gel and separated by SDS-PAGE, and the resolved proteins were transferred to nitrocellulose membrane. After blocking with 5% nonfat milk in TBST (20 mM Tris-HCl, pH 8.0, 150 mM NaCl, 0.1% Tween 20) for overnight at 4 °C, the blot was incubated with primary antibody for 2 h at room temperature. The membrane was then washed three times with TBST and probed with HRP-conjugated secondary antibody for 1 h. The membrane was washed three times in TBST and developed by ECL according to the

manufacturer's protocol.

### ***Co-immunoprecipitation***

HeLa cells stably expressing OMA1-Flag or OMA1-E324Q were treated with or without CCCP, cells were lysed in a Triton X-100 based lysis buffer (1% Triton X-100, 10% glycerol, 150 mM NaCl, 20 mM Tris, pH7.4, 2 mM EDTA, protease inhibitor mixture) for 1h, and the nuclear and cellular debris was removed by centrifugation. Then the lysates were incubated with anti-FLAG M2 affinity gel (Sigma) for 4 h at 4 °C. The resin was washed 5 times with lysis buffer, and the protein extracts were analyzed on SDS-PAGE followed by Western blot analysis.

### ***Confocal Microscopy and Image Processing***

Confocal microscopy (FV1000) was performed with an Olympus IX81 microscope. MEFs were plated on cover slips and fixed with 10% formalin. The FV10-ASW 3.0 software was used for image processing and analysis. Mitochondria were identified by mito-GFP. To determine mitochondrial morphology, cells were randomly selected for quantitative analysis and visually scored into four classifications ('Highly connected', 'Tubular', 'Tubular and Fragmented' and 'Fragmented',).
